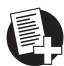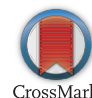

# Ocular Anti-VEGF Therapy for Diabetic Retinopathy: The Role of VEGF in the Pathogenesis of Diabetic Retinopathy

Rafael Simó,<sup>1</sup> Jeffrey M. Sundstrom,<sup>2</sup> and David A. Antonetti<sup>2</sup>

*Diabetes Care* 2014;37:893–899 | DOI: 10.2337/dc13-2002

**Diabetic retinopathy is the leading cause of visual impairment and preventable blindness, and represents a significant socioeconomic cost for health care systems worldwide. Therefore, new approaches beyond current standards of diabetes care are needed. Based on the crucial pathogenic role of vascular endothelial growth factor (VEGF) in the development of diabetic macular edema (DME), intravitreal anti-VEGF agents have emerged as new treatments. To provide an understanding of the rationale for use and clinical efficacy of anti-VEGF treatment, we examine this topic in a two-part Bench to Clinic narrative. In the Bench narrative, we provide an overview of the role of VEGF in the pathogenesis of diabetic retinopathy, the molecular characteristics of anti-VEGF agents currently used, and future perspectives and challenges in this area. In the Clinic narrative that follows our contribution, Cheung et al. provide an overview of the current evidence from clinical trials on anti-VEGF therapy for diabetic retinopathy.**

Diabetic retinopathy is the most common complication of diabetes and one of the leading causes of preventable blindness (1). The tight control of blood glucose levels and blood pressure are essential in preventing or arresting diabetic retinopathy development. However, these therapeutic objectives are difficult to achieve and diabetic retinopathy develops in a high proportion of patients. In fact, population-based studies suggest that one-third of the diabetic patients have signs of diabetic retinopathy and one-tenth have vision-threatening states of retinopathy, such as diabetic macular edema (DME) and proliferative diabetic retinopathy (PDR) (2). The main pathogenic element in DME is the disruption of the blood-retinal barrier (BRB), whereas neovascularization is the hallmark of PDR. However, vascular endothelial growth factor (VEGF) plays a central role in both DME and PDR development (3).

When diabetic retinopathy appears, the prior standard of care relied on laser photocoagulation, which is inherently destructive, associated with unavoidable side effects (i.e., visual field loss and impairment of either dark adaptation or color vision), and not universally effective in reversing or preventing visual loss. Intravitreal corticosteroids have been successfully used in eyes with persistent DME and loss of vision following the failure of conventional treatment. However, reinjections are commonly needed, and there are substantial adverse effects, such as infection, glaucoma, and cataract formation. Vitreoretinal surgery is an expensive treatment that should be carried out only by vitreoretinal specialists experienced in this procedure and it is normally reserved for the blinding complications of PDR, such as severe vitreous hemorrhage and secondary retinal detachment (4).

<sup>1</sup>Diabetes and Metabolism Research Unit, Vall d'Hebron Research Institute, Universitat Autònoma de Barcelona and Centro de Investigación Biomédica en Red de Diabetes y Enfermedades Metabólicas Asociadas (CIBERDEM), ISCIII, Barcelona, Spain

<sup>2</sup>Department of Ophthalmology and Visual Sciences and Molecular and Integrative Physiology, Kellogg Eye Center, University of Michigan, Ann Arbor, MI

Corresponding author: Rafael Simó, rafael.simo@vhir.org.

Received 24 August 2013 and accepted 3 January 2014.

© 2014 by the American Diabetes Association. See <http://creativecommons.org/licenses/by-nc-nd/3.0/> for details.

See accompanying article, p. 900.

In recent years, intravitreal anti-VEGF agents have emerged as new treatments for DME. However, this is an invasive procedure that can have complications, such as endophthalmitis and retinal detachment, and may have deleterious effects for the remaining healthy retina. This is especially important in diabetic patients in whom long-term administration is to be expected. Apart from local side effects, anti-VEGF agents might also produce systemic complications (i.e., hypertension, proteinuria, ischemic cardiovascular disease) due to their capacity to pass into systemic circulation. Current evidence indicates that this is very unlikely, but further studies in diabetic patients on the long-term effectiveness and safety of intravitreal anti-VEGF agents are still needed (5). In this article, an overview of the role of VEGF in the pathogenesis of diabetic retinopathy will be given. In addition, the molecular characteristics of anti-VEGF agents currently used, their differences, and future perspectives and challenges in this area will be provided.

### VEGF: GENERAL ACTIONS, ISOFORMS, AND RECEPTORS

The VEGF family is composed of five structurally related ligands: VEGF-A, VEGF-B, VEGF-C, VEGF-D, and placenta growth factor (PlGF). These ligands bind in an overlapping pattern to three tyrosine kinase receptors (VEGFR-1, VEGFR-2, and VEGFR-3) (6).

VEGF-A, which we refer to as VEGF, is a potent mitogen for micro- and macrovascular endothelial cells derived from arteries, veins, and lymphatics. VEGF is required for normal vascular development and even deletion of one VEGF allele is embryonic lethal (6). VEGF is also a survival factor and plays an essential role in maintaining the integrity of endothelial cells via antiapoptotic signaling (7). In addition, there is evidence to suggest that pericyte support of vessel survival is closely related to VEGF-induced expression (8).

The human VEGF gene is organized in eight exons, separated by seven introns, and is localized in chromosome 6p21.3. Alternative exon splicing results in the generation of four isoforms, having 121, 165, 189, and 206 amino acids, respectively, after signal sequence cleavage (VEGF<sub>121</sub>, VEGF<sub>165</sub>, VEGF<sub>189</sub>, VEGF<sub>206</sub>). The predominant molecular variant is

VEGF<sub>165</sub>, a basic, heparin-binding homodimeric glycoprotein of 45 kDa. VEGF<sub>165</sub> specifically binds to neuropilin-1, thus enhancing VEGFR2 signaling (8). Less frequent splice variants have been reported, including VEGF<sub>145</sub>, VEGF<sub>183</sub>, VEGF<sub>162</sub>, and VEGF<sub>165b</sub>, paradoxically a variant reported to have an inhibitory effect on VEGF-induced angiogenesis (9). This isoform inhibits neovascularization but not revascularization, and is cytoprotective for endothelial and epithelial cells *in vivo* and *in vitro*.

The affinity for heparin may profoundly affect the bioavailability of VEGF. VEGF<sub>121</sub> fails to bind to heparin and, therefore, is a freely soluble protein. In contrast, VEGF<sub>189</sub> and VEGF<sub>206</sub> bind to heparin with high affinity and consequently, they are almost completely sequestered in the extracellular matrix. VEGF<sub>165</sub> has intermediate properties, as it is secreted and circulates as diffusible protein, but a significant fraction remains bound to the cell surface and the extracellular matrix. However, the isoforms quenched in the extracellular

matrix may be released in a diffusible form by heparin, heparinase, or plasmin. Therefore, VEGF<sub>165</sub> may act both as a diffusible factor and as a heparin-binding form that is released upon heparin cleavage (6).

VEGF-A and -B exert their actions through two high-affinity tyrosine kinase receptors, VEGFR-1 (Flt-1) and VEGFR-2 (KDR, human; Flk-1, mouse), which are mainly expressed on the cell surface of vascular endothelium. VEGFR-3 is a member of the same family, but binds VEGF-C and -D (VEGF-related molecules) rather than VEGF-A. PlGF and VEGF-B are other VEGF-related members that bind VEGFR-1 but not VEGFR-2 or VEGFR-3. VEGFR-2 signal transduction has been examined in great detail, and early signaling events that control survival, proliferation, and permeability have been identified while final downstream effectors are less well characterized. A schematic highlighting some of the important signaling mechanisms of VEGFR-2 activation is provided in Fig. 1, while a comprehensive review on VEGF

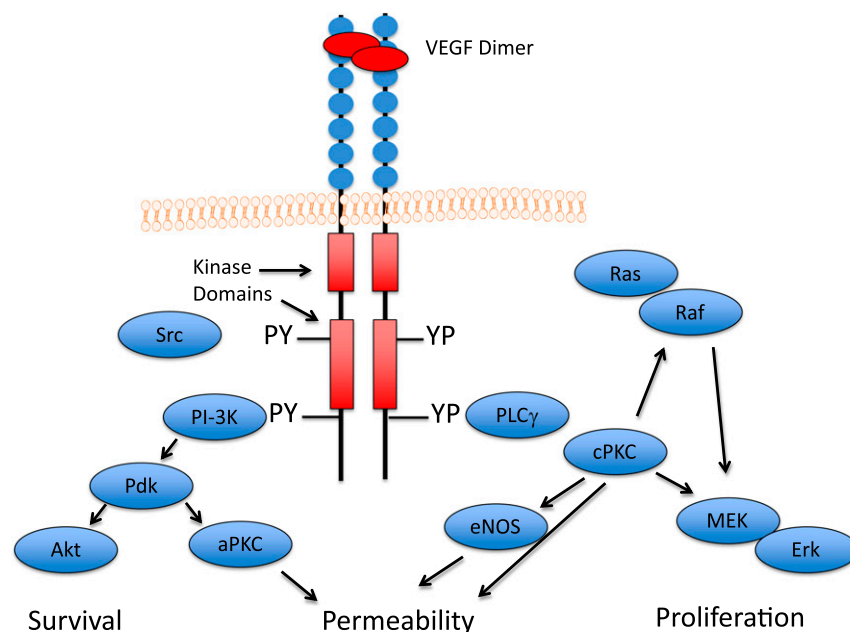

**Figure 1**—Schematic of VEGF signal transduction. VEGF-A forms a dimer and binds to VEGFR-2 in a typical receptor tyrosine kinase activation pathway, inducing kinase domain activation and cross-receptor phosphorylation. The phosphorylation of the receptor (and adaptors, not shown) allows binding of signaling molecules possessing phosphotyrosine-binding motifs, such as SH2 domains. Signal transduction pathways include activation of the p42/p44 extracellular regulated kinase (Erk) pathway that contributes to control of proliferation. PKC pathways, including conventional (cPKC) and atypical (aPKC), are both activated and, along with endothelial nitric oxide synthase (eNOS), contribute to vascular permeability and macular edema. The phosphatidylinositol 3-kinase (PI-3K) pathway and activation of Akt contributes to endothelial cell survival. Targeting VEGF-A with antibodies effectively prevents both VEGF-dependent angiogenesis and vascular permeability.

signal transduction has been previously reported (10).

There is much evidence to suggest that VEGFR-2 is the major mediator of endothelial cell mitogenesis, survival, and microvascular permeability. Indeed, tyrosine kinase activity of VEGFR-2 is one order of magnitude higher than that of VEGFR-1 in experimental conditions (6). In contrast, VEGFR-1 does not mediate an effective mitogenic signal in endothelial cells, and, at least in early development, it may have inhibiting properties by sequestering VEGF and rendering this factor less available to VEGFR-2 (6). Such a “decoy” role could be also performed by the alternative spliced soluble VEGFR-1 (sFlt-1). However, it has been proposed that activation of VEGFR-1 by PlGF produces a transphosphorylation of VEGFR-2, thus amplifying VEGF-driven angiogenesis through VEGFR-2 (11). In fact, in vivo studies have demonstrated that an antibody against VEGFR-1 is capable of inhibiting tumor and retinal angiogenesis (12). Therefore, cross talk between

VEGF receptors likely exists, and, depending on circumstances, a dual activity of VEGFR-1 can be exerted.

VEGFR-1 seems the predominant receptor in microvessels of the normal human retina, whereas VEGFR-2 expression becomes increased during diabetic retinopathy development (13). In addition, it should be noted that apart from the eventual negative regulation of VEGFR-2 signaling, VEGFR-1 activation induces vascular permeability, monocyte and macrophage migration, and the recruitment of hematopoietic progenitor cells (6,14). Finally, VEGFR-3 is a critical regulator of developmental and adult vasculogenesis and lymphangiogenesis (6,14).

### MECHANISMS REGULATING VEGF EXPRESSION

Several mechanisms have been shown to participate in the regulation of VEGF gene expression (Fig. 2). Hypoxia is one of the most well-characterized factors that induce VEGF gene expression. Transcriptional activation leading to VEGF

upregulation in response to hypoxia requires the stabilization of hypoxia-inducible factor 1 (HIF-1) (6).

Changes in glucose levels are another major factor involved in VEGF expression. In this regard, both long-term high glucose concentration and acute glucose deprivation can upregulate VEGF in cultured bovine retinal pigment epithelium (RPE) cells (15). Production of advanced glycation end products (AGEs) could be one of the mechanisms by which chronic hyperglycemia stimulates VEGF mRNA expression, and conversely this could also explain the angiogenic properties of AGEs. In this regard, it has been reported that intravitreal injection of AGEs in rats and rabbits increased VEGF mRNA levels in the ganglion, inner nuclear, and RPE cell layers of the retina (16). This effect was dose- and time-dependent, additive with hypoxia, and could be blocked by using anti-VEGF antibodies (16). In addition, HIF-1 $\alpha$  activation by AGEs through the extracellular regulated kinase pathway could be also involved in VEGF expression mediated by AGEs (17).

Apart from hypoxia, changes in blood glucose levels, and AGEs, a variety of growth factors, including insulin, IGF-1, fibroblast growth factor (FGF), and platelet-derived growth factor (PDGF), as well as proinflammatory cytokines (i.e., interleukin [IL]-1 and IL-6), several hormones (i.e., TSH, ACTH, and gonadotropin), and oncogenes (i.e., K-ras, Wnt) could upregulate VEGF mRNA expression (6). It is important to note the relationship observed between insulin and VEGF expression. Lu et al. (18) reported that insulin increased VEGF mRNA and secreted protein levels in RPE cells through enhanced transcription of the VEGF gene. Yamagishi et al. (19) obtained evidence that in human skin microvascular endothelial cells, VEGF is the main factor responsible for the angiogenic activity of insulin. Poulaki et al. (20) demonstrated that acute intensive insulin therapy produced a transient worsening of diabetic BRB breakdown via an HIF-1 $\alpha$ -mediated increase in retinal VEGF expression. Finally, Hernández et al. (21) provided evidence that diabetic patients with blurred vision after starting insulin therapy present a significant transient increase of macular biometrics (volume and thickness) that is associated with a

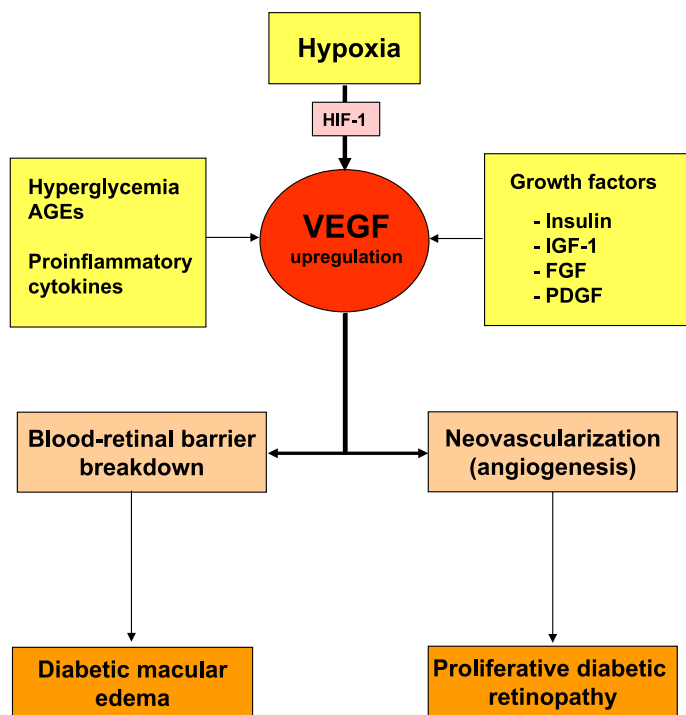

**Figure 2**—Main mechanisms involved in VEGF upregulation and its consequences in the pathogenesis of diabetic retinopathy. Hypoxia is the most important trigger for VEGF upregulation mainly through HIF-1. Hyperglycemia, AGEs, and proinflammatory cytokines are among the other stimulating factors that could increase VEGF production by the diabetic retina. The main deleterious consequences of VEGF overexpression are the disruption of the blood-retinal barrier (the pathogenic hallmark of diabetic macular edema) and neovascularization (the hallmark of proliferative diabetic retinopathy). FGF, fibroblast growth factor; PDGF, platelet-derived growth factor.

decrease in circulating sFlt-1. Taken together, these findings could contribute to understanding of the transient worsening of diabetic retinopathy that might occur after starting intensive insulin therapy.

### VEGF-MEDIATED ACTIONS IN DIABETIC RETINOPATHY

VEGF is a well-known pathogenic factor for the disruption of the BRB and neovascularization, which are the primary pathogenic events of DME and PDR, respectively (Fig. 2). In addition, there is emerging evidence that VEGF has also significant neurotrophic and neuroprotective properties (22–24).

Numerous retinal cells synthesized VEGF, including RPE cells, pericytes, endothelial cells, glial cells, Müller cells, and ganglion cells (25). The specific site in which VEGF is produced is important in accounting for the local actions. For instance, the major function of ganglion cell–derived VEGF is not pathogenic and is important as an autocrine-paracrine neurotrophic factor for neuron cell survival under stress conditions (23). By contrast, conditional gene deletion studies demonstrate that Müller cell–derived VEGF seems to be primarily responsible for BRB breakdown and neovascularization in rodent disease models (26,27). VEGF is also an important link between the neurodegenerative process that occurs in early stages of diabetic retinopathy and the BRB breakdown (28). The most important VEGF-mediated actions in the pathogenesis of diabetic retinopathy are the breakdown of the BRB and angiogenesis.

#### Breakdown of BRB

The BRB consists of the outer BRB formed by the RPE and the inner BRB involving the endothelial cells of the vasculature network within the inner retina. Tight junctions between neighboring RPE cells and neighboring endothelial cells are essential in the strict control of the fluid and solutes that cross the BRB. Vascular leakage as a consequence of the breakdown of the BRB, in particular the inner BRB, contributes to the pathogenesis of DME. For many patients, this change in vascular permeability is mediated by increased VEGF, also known as vascular permeability factor (VPF) due to its ability to induce vascular leakage. VEGF may induce permeability by transport through cells

by inducing fenestrae and vesicles by breakdown of the junctional complex (10). VEGF-induced breakdown of the BRB requires conventional protein kinase C (PKC) $\beta$  activation, which phosphorylates the tight junction protein occludin, thus inducing the disassembly of the tight junctions and contributing to vascular permeability (29,30). In addition, activation of atypical PKC also contributes to VEGF-induced permeability in a separate but required pathway with, as yet, unidentified downstream targets (31). Further, phosphorylation and internalization of the adherens junction protein, VE-cadherin, also contributes to VEGF-induced permeability (32). In addition, the critical role of nitric oxide in VEGF-induced vascular permeability and angiogenesis has been reported (33). These downstream signaling pathways may provide opportunities for development of next-generation inhibitors to prevent VEGF action on BRB permeability. In this regard, a multi-point model based on well-established drug development principles, with the goal of improving the success of clinical drug development focused on anti-VEGF therapy, has been recently proposed (34).

#### Angiogenesis

It has been extensively reported that both VEGF and its receptors are increased in the retina of animal models with either ischemic retinopathy or diabetes, as well as in diabetic patients (25). VEGF concentration has been found strikingly higher in the vitreous fluid of PDR patients than in nondiabetic control subjects and expression is related to active retinopathy (35). It should be emphasized that the vitreal concentration of VEGF detected in PDR patients can induce proliferation using *in vitro* models, and studies of both gain and loss of function for VEGF demonstrate this factor is capable of inducing retinal angiogenesis.

The mechanisms by which VEGF induces neovascularization in PDR are multifactorial; however, critical factors have been identified and are highlighted here. Activation of PKC- $\beta$ 2 isoform has been reported to be important for VEGF-dependent retinal neovascularization (36), likely involving activation of extracellular regulated kinase pathway. Apart from the mitogenic effect, VEGF

has other properties that contribute to neovascularization. VEGF induces the expression of serine proteases, tissue-type plasminogen activators, and metalloproteinases, as well as significantly decreasing the tissue inhibitors of metalloproteinases TIMP-1 and TIMP-2 (37,38). These effects are crucial in favoring the proteolysis of the basement membrane, which is the first step in the angiogenic process that leads to PDR. Another mechanism by which VEGF could promote angiogenesis is through the enhancement of intercellular adhesion molecule 1 (ICAM-1) (27) and vascular adhesion molecule 1 (VCAM-1) (39). In this regard, a direct correlation between VCAM-1 and VEGF in the vitreous fluid of diabetic patients with PDR has been reported (40).

### CURRENT ANTI-VEGF THERAPIES

Clinicians now have a number of options for reducing VEGF signaling in the retina through intravitreal injection of anti-VEGF biologics.

Pegaptanib is a conjugated to polyethylene glycol neutralizing RNA aptamer with an extremely high affinity for human VEGF<sub>165</sub> (5). An important feature of aptamers is that, unlike a number of recombinant human proteins, they are essentially nonimmunogenic. Pegaptanib was the first anti-VEGF approved by the U.S. Food and Drug Administration for treatment of exudative age-related macular degeneration (December 2004). However, the lack of robust clinical trials has prevented its approval for the treatment of DME or PDR.

Current evidence indicates that there are three anti-VEGF agents that could be useful for diabetic retinopathy: bevacizumab, ranibizumab, and aflibercept (34) (Table 1). Bevacizumab is a full-length murine monoclonal, anti-VEGF antibody that has been humanized, which has the distinct advantage of the lowest cost of the available therapies, but has no large-scale clinical trial data to support selecting this therapy for DME or PDR. In addition, it should be noted that intravitreal injections of bevacizumab is an “off-label” therapy. Ranibizumab is an affinity-enhanced antibody fragment developed from bevacizumab (34). The Fab fragment lacks the Fc portion and is smaller with monovalent binding to VEGF, as opposed to the bivalent binding of the bevacizumab

**Table 1—Main characteristics of current anti-VEGF agents used for treatment of diabetic retinopathy**

| Anti-VEGF therapy | Class         | Molecular weight | Targets                       | K <sub>D</sub> for VEGF <sub>165</sub> |                                                                                     |
|-------------------|---------------|------------------|-------------------------------|----------------------------------------|-------------------------------------------------------------------------------------|
| Bevacizumab       | Monoclonal Ab | 149 kDa          | All VEGF isoforms             | 58 pM                                  |  |
| Ranibizumab       | Fab           | 48 kDa           | All VEGF isoforms             | 46 pM                                  |  |
| Aflibercept       | VEGF-Trap     | 115 kDa          | All VEGF isoforms VEGF-B PIGF | 0.49 pM                                |  |

Biochemical traits of current anti-VEGF therapies include bevacizumab, an antibody to VEGF; ranibizumab, a fragment of an antibody to VEGF; and aflibercept, an in-line fusion protein of VEGFR-1 (red) and VEGFR-2 (green) extracellular ligand-binding domains linked to the Fc portion of human IgG1. Ab: antibody; Fab: antibody fragment.

antibody but with a higher affinity (Table 1). Ranibizumab is the only approved drug for intravitreal use in DME in the U.S. and Europe. Finally, the VEGF-Trap, aflibercept, was created as an in-line fusion protein of VEGFR-1 and VEGFR-2 extracellular ligand-binding domains linked to the Fc portion of human IgG1 (41).

Recent clinical trials with anti-VEGF therapies have demonstrated significant improved visual acuity for patients suffering from DME, ranibizumab being the most thoroughly tested (42).

Comparison of binding of aflibercept with ranibizumab and bevacizumab reveals a markedly higher binding affinity of aflibercept for VEGF-A<sub>165</sub>, approximately 100-fold, (Table 1) (43). Modeling studies suggest that this difference in binding affinity may allow aflibercept to provide effective VEGF-A binding for a significantly longer time after injection, potentially reducing the time between repeat injections (44).

The presence of the Fc portion on bevacizumab and aflibercept, but not ranibizumab, may explain several differences in pharmacokinetics. Production of the smaller ranibizumab may allow better diffusion, but the presence of an Fc-binding receptor in the BRB may affect transport dynamics across the retina or into circulation. Indeed, recent measures of serum VEGF concentration in a small cohort after bevacizumab or ranibizumab intravitreal injection reveals that bevacizumab, but not ranibizumab, reduces plasma VEGF for up to 1 month after injection (45). However, the half-lives of all three molecules are very similar, ranging from

3.2 days (ranibizumab) to 4.8 days (aflibercept) to 5.6 days (bevacizumab) (44), thus suggesting the Fc portion does not have a dramatic effect on transport out of the retina.

Clearly, additional studies on the differences in kinetics of bevacizumab versus ranibizumab and aflibercept are needed to ensure minimal systemic effects of intravitreal anti-VEGF therapy. Most notably, aflibercept binds VEGF-B and PIGF, which may contribute to vascular eye disease, and thus, coupled with higher affinity for binding VEGF-A, may have distinct advantage in effectiveness with reduced time of dosing. It will be critical to also determine any effects on neurodegeneration as the higher affinity and broader binding profile could affect a potential role of VEGF signaling in the neuroretina.

A study directly comparing the change in visual acuity after 1 year for ranibizumab, bevacizumab, and aflibercept was initiated in 2012 and will be completed in 2016 by the Diabetic Retinopathy Clinical Research Network (ClinicalTrials.gov, <http://clinicaltrials.gov/ct2/show/NCT01627249>).

#### ADVERSE EVENTS RELATED TO ANTI-VEGF TREATMENT

A recent meta-analysis was conducted to determine the effectiveness of anti-VEGF for the treatment of DME to determine the rate of ocular and non-ocular side effects. Overall, these events are rare and have been studied imprecisely to date. Across all studies included in the analysis, infectious endophthalmitis occurred in 9 of 2,287 total

patients (3.9 patients per 1,000). Non-ocular side effects, as defined by the Antiplatelet Trialists' Collaboration (ATC) events and death, were not different in anti-VEGF-treated arm versus the assumed risk group (46). However, it should be noted that most data were obtained at 1 year and, therefore, long-term confirmation is needed.

There is some concern that consistent exposure to anti-VEGF may result in geographic atrophy. A recent study demonstrated in mice that VEGF produced by the RPE contributes to maintenance of the choriocapillaris (the vascular network that underlies the retina) (47). While genetic ablation of soluble VEGF from the RPE did not lead to complete choriocapillary loss, there was a reduction in vascular area covered and the ERG A-wave and B-wave amplitude. Anti-VEGF therapy related to geographic atrophy has been noted as occurring slightly more frequently in patients treated with monthly ranibizumab versus bevacizumab for wet age-related macular degeneration. However, extrapolation of these data to patients with diabetic retinopathy should be done cautiously given the disparate underlying pathophysiology. The potential for anti-VEGF treatment to cause geographic atrophy in diabetic retinopathy will require further study.

Finally, the potential inhibition of the neuroprotective effects of VEGF should also be taken into account in long-term administration of anti-VEGF agents. The neuroprotective and neurotrophic effects of VEGF in the brain are well established (48), and there is growing

evidence that this is also true in the retina (22–24). In this regard, a dose-dependent decrease in ganglion cells has been reported following the injection of an antibody that blocks all VEGF isoforms in rats (23). These findings could have clinical implications as to date clinical trials using anti-VEGF treatment have focused only on studying the systemic side effects, such as cardiovascular, hypertension, proteinuria, or bleeding, but not the incidence of retinal neurodegeneration, such as retinal atrophy or RPE cell degeneration (6). Therefore, further research on this issue is urgently needed.

## CONCLUSIONS

Diabetic retinopathy remains the most common cause of visual impairment in working-aged individuals. Therefore, new therapeutic strategies are needed to reduce the significant burden associated with this common complication of diabetes. As retinal overexpression of VEGF plays an essential role in the development of both DME and PDR, intravitreal anti-VEGF agents have emerged as new treatments for these debilitating complications of diabetes. At present, anti-VEGF agents have been shown to be effective and safe treatments for DME, and ongoing and future studies will reveal their potential value for treating PDR. However, as diabetic retinopathy is a chronic condition, long-term data to evaluate both the efficacy as well as local and systemic adverse effects are needed. In addition, head-to-head studies of these drugs would provide useful information. Finally, new therapeutic approaches to selectively block VEGF angiogenic and permeabilizing actions, while sparing VEGF neuroprotective and choroidal trophic actions seem warranted.

**Funding.** This study was supported by grants from the Ministerio de Economía y Competitividad (SAF2009-07408 and SAF-2012-35562), from the Generalitat de Catalunya (SGR2009-739), and from CIBERDEM, an initiative of the Instituto de Salud Carlos III.

**Duality of Interest.** No potential conflicts of interest relevant to this article were reported.

## References

- Cheung N, Mitchell P, Wong TY. Diabetic retinopathy. *Lancet* 2010;376:124–136
- Lamoureux EL, Wong TY. Diabetic retinopathy in 2011: further insights from new epidemiological

- studies and clinical trials. *Diabetes Care* 2011;34:1066–1067
- Antonetti DA, Klein R, Gardner TW. Diabetic retinopathy. *N Engl J Med* 2012;366:1227–1239
- Simó R, Hernández C. Advances in the medical treatment of diabetic retinopathy. *Diabetes Care* 2009;32:1556–1562
- Simó R, Hernández C. Intravitreal anti-VEGF for diabetic retinopathy: hopes and fears for a new therapeutic strategy. *Diabetologia* 2008;51:1574–1580
- Ferrara N. Vascular endothelial growth factor: basic science and clinical progress. *Endocr Rev* 2004;25:581–611
- Hammes HP, Lin J, Renner O, et al. Pericytes and the pathogenesis of diabetic retinopathy. *Diabetes* 2002;51:3107–3112
- Shih SC, Ju M, Liu N, Mo JR, Ney JJ, Smith LE. Transforming growth factor beta1 induction of vascular endothelial growth factor receptor 1: mechanism of pericyte-induced vascular survival in vivo. *Proc Natl Acad Sci USA* 2003;100:15859–15864
- Magnussen AL, Rennel ES, Hua J, et al. VEGF-A165b is cytoprotective and antiangiogenic in the retina. *Invest Ophthalmol Vis Sci* 2010;51:4273–4281
- Penn JS, Madan A, Caldwell RB, Bartoli M, Caldwell RW, Hartnett ME. Vascular endothelial growth factor in eye disease. *Prog Retin Eye Res* 2008;27:331–371
- Autiero M, Waltenberger J, Communi D, et al. Role of PlGF in the intra- and intermolecular cross talk between the VEGF receptors Flt1 and Flk1. *Nat Med* 2003;9:936–943
- Luttun A, Tjwa M, Moons L, et al. Revascularization of ischemic tissues by PlGF treatment, and inhibition of tumor angiogenesis, arthritis and atherosclerosis by anti-Flt1. *Nat Med* 2002;8:831–840
- Witmer AN, Vrensen GFJM, Van Noorden CJF, Schlingemann RO. Vascular endothelial growth factors and angiogenesis in eye disease. *Prog Retin Eye Res* 2003;22:1–29
- Olsson AK, Dimberg A, Kreuger J, Claesson-Welsh L. VEGF receptor signalling - in control of vascular function. *Nat Rev Mol Cell Biol* 2006;7:359–371
- Sone H, Kawakami Y, Okuda Y, et al. Vascular endothelial growth factor is induced by long-term high glucose concentration and up-regulated by acute glucose deprivation in cultured bovine retinal pigmented epithelial cells. *Biochem Biophys Res Commun* 1996;221:193–198
- Lu M, Kuroki M, Amano S, et al. Advanced glycation end products increase retinal vascular endothelial growth factor expression. *J Clin Invest* 1998;101:1219–1224
- Treins C, Giorgetti-Peraldi S, Murdaca J, Van Obberghen E. Regulation of vascular endothelial growth factor expression by advanced glycation end products. *J Biol Chem* 2001;276:43836–43841
- Lu M, Amano S, Miyamoto K, et al. Insulin-induced vascular endothelial growth factor expression in retina. *Invest Ophthalmol Vis Sci* 1999;40:3281–3286
- Yamagishi S, Kawakami T, Fujimori H, et al. Insulin stimulates the growth and tube formation of human microvascular endothelial cells through autocrine vascular endothelial growth factor. *Microvasc Res* 1999;57:329–339

- Poulaki V, Qin W, Jousseaume AM, et al. Acute intensive insulin therapy exacerbates diabetic blood-retinal barrier breakdown via hypoxia-inducible factor-1 $\alpha$  and VEGF. *J Clin Invest* 2002;109:805–815
- Hernández C, Zapata MA, Losada E, et al. Effect of intensive insulin therapy on macular biometrics, plasma VEGF and its soluble receptor in newly diagnosed diabetic patients. *Diabetes Metab Res Rev* 2010;26:386–392
- Jin KL, Mao XO, Greenberg DA. Vascular endothelial growth factor: direct neuroprotective effect in in vitro ischemia. *Proc Natl Acad Sci USA* 2000;97:10242–10247
- Nishijima K, Ng YS, Zhong L, et al. Vascular endothelial growth factor-A is a survival factor for retinal neurons and a critical neuroprotectant during the adaptive response to ischemic injury. *Am J Pathol* 2007;171:53–67
- Saint-Geniez M, Maharaj AS, Walshe TE, et al. Endogenous VEGF is required for visual function: evidence for a survival role on müller cells and photoreceptors. *PLoS One* 2008;3:e3554
- Simó R, Carrasco E, García-Ramírez M, Hernández C. Angiogenic and antiangiogenic factors in proliferative diabetic retinopathy. *Curr Diabetes Rev* 2006;2:71–98
- Bai Y, Ma JX, Guo J, et al. Müller cell-derived VEGF is a significant contributor to retinal neovascularization. *J Pathol* 2009;219:446–454
- Wang J, Xu X, Elliott MH, Zhu M, Le YZ. Müller cell-derived VEGF is essential for diabetes-induced retinal inflammation and vascular leakage. *Diabetes* 2010;59:2297–2305
- Simó R, Hernández C. Neurodegeneration in the diabetic eye: new insights and therapeutic perspectives. *Trends Endocrinol Metab* 2014;25:23–33
- Murakami T, Felinski EA, Antonetti DA. Occludin phosphorylation and ubiquitination regulate tight junction trafficking and vascular endothelial growth factor-induced permeability. *J Biol Chem* 2009;284:21036–21046
- Murakami T, Frey T, Lin C, Antonetti DA. Protein kinase c $\beta$  phosphorylates occludin regulating tight junction trafficking in vascular endothelial growth factor-induced permeability in vivo. *Diabetes* 2012;61:1573–1583
- Titchenell PM, Lin CM, Keil JM, Sundstrom JM, Smith CD, Antonetti DA. Novel atypical PKC inhibitors prevent vascular endothelial growth factor-induced blood-retinal barrier dysfunction. *Biochem J* 2012;446:455–467
- Gavard J, Gutkind JS. VEGF controls endothelial-cell permeability by promoting the beta-arrestin-dependent endocytosis of VE-cadherin. *Nat Cell Biol* 2006;8:1223–1234
- Fukumura D, Gohongi T, Kadambi A, et al. Predominant role of endothelial nitric oxide synthase in vascular endothelial growth factor-induced angiogenesis and vascular permeability. *Proc Natl Acad Sci USA* 2001;98:2604–2609
- Titchenell PM, Antonetti DA. Using the past to inform the future: anti-VEGF therapy as a road map to develop novel therapies for diabetic retinopathy. *Diabetes* 2013;62:1808–1815
- Aiello LP, Avery RL, Arrigg PG, et al. Vascular endothelial growth factor in ocular fluid of patients with diabetic retinopathy and other retinal disorders. *N Engl J Med* 1994;331:1480–1487

36. Suzuma K, Takahara N, Suzuma I, et al. Characterization of protein kinase C beta isoform's action on retinoblastoma protein phosphorylation, vascular endothelial growth factor-induced endothelial cell proliferation, and retinal neovascularization. *Proc Natl Acad Sci USA* 2002;99:721–726
37. Pepper MS, Ferrara N, Orci L, Montesano R. Vascular endothelial growth factor (VEGF) induces plasminogen activators and plasminogen activator inhibitor-1 in microvascular endothelial cells. *Biochem Biophys Res Commun* 1991;181:902–906
38. Lamoreaux WJ, Fitzgerald ME, Reiner A, Hasty KA, Charles ST. Vascular endothelial growth factor increases release of gelatinase A and decreases release of tissue inhibitor of metalloproteinases by microvascular endothelial cells in vitro. *Microvasc Res* 1998;55:29–42
39. Melder RJ, Koenig GC, Witwer BP, Safabakhsh N, Munn LL, Jain RK. During angiogenesis, vascular endothelial growth factor and basic fibroblast growth factor regulate natural killer cell adhesion to tumor endothelium. *Nat Med* 1996;2:992–997
40. Hernández C, Burgos R, Cantón A, García-Arumí, Segura RM, Simó R. Vitreous levels of vascular adhesion molecule and vascular endothelial growth factor in patients with proliferative diabetic retinopathy: a case-control study. *Diabetes Care* 2001;24:516–521
41. Holash J, Davis S, Papadopoulos N, et al. VEGF-Trap: a VEGF blocker with potent antitumor effects. *Proc Natl Acad Sci USA* 2002;99:11393–11398
42. Cheung N, Wong IY, Wong TY. Ocular anti-VEGF therapy for diabetic retinopathy: overview of clinical efficacy and evolving applications. *Diabetes Care* 2014;37:900–905
43. Papadopoulos N, Martin J, Ruan Q, et al. Binding and neutralization of vascular endothelial growth factor (VEGF) and related ligands by VEGF Trap, ranibizumab and bevacizumab. *Angiogenesis* 2012;15:171–185
44. Stewart MW, Rosenfeld PJ, Penha FM, et al. Pharmacokinetic rationale for dosing every 2 weeks versus 4 weeks with intravitreal ranibizumab, bevacizumab, and aflibercept (vascular endothelial growth factor Trap-eye). *Retina* 2012;32:434–457
45. Zehetner C, Kirchmair R, Huber S, Kralinger MT, Kieselbach GF. Plasma levels of vascular endothelial growth factor before and after intravitreal injection of bevacizumab, ranibizumab and pegaptanib in patients with age-related macular degeneration, and in patients with diabetic macular oedema. *Br J Ophthalmol* 2013;97:454–459
46. Virgili G, Parravano M, Menchini F, Brunetti M. Antiangiogenic therapy with anti-vascular endothelial growth factor modalities for diabetic macular oedema. *Cochrane Database Syst Rev* 2012;12:CD007419
47. Saint-Geniez M, Kurihara T, Sekiyama E, Maldonado AE, D'Amore PA. An essential role for RPE-derived soluble VEGF in the maintenance of the choriocapillaris. *Proc Natl Acad Sci USA* 2009;106:18751–18756
48. Zachary I. Neuroprotective role of vascular endothelial growth factor: signalling mechanisms, biological function, and therapeutic potential. *Neurosignals* 2005;14:207–221
